# Supplementary material for: Honeybee caste lipidomics in relation to life-history stages and the long life of the queen
Source: Oxford University Press journal article supplement (doi:10.1242/jeb.207043), 2019-01-01
Supplement: jeb207043supp.pdf [file jeb207043supp.pdf]

**Table S1 – Composition of internal standard added to the lipid extracts**

| Molecular phospholipids | nmol per sample |
|-------------------------|-----------------|
| LPC 17:0                | 15              |
| PC 19:0_19:0            | 80              |
| LPE 14:0                | 15              |
| PE 17:0_17:0            | 50              |
| PIn 18:0_18:0           | 10              |
| PS 17:0_17:0            | 15              |

LPC: Lysophosphatidylcholine; LPE: lysophosphaethanolamine; PC: phosphatidylcholine; PE: phosphatidylethanolamine; PIn: phosphatidylinositol; PS: phosphatidylserine. Concentrations are for post-emergent bee samples. For larvae and pupae, 50 % of the concentration values were used (e.g. 7.5 nmol for LPC 17:0).

Table S2 – List of precursor ion scans used for the lipidomics

|                                 | Ion Mode | Scan     | DP  | EP | CE | CXP | Mass Range | Da/ second |
|---------------------------------|----------|----------|-----|----|----|-----|------------|------------|
| <i>Phospholipid class scans</i> |          |          |     |    |    |     |            |            |
| PC                              | Positive | PI 184.1 | 100 | 10 | 40 | 8   | 640-850    | 200        |
| lyso-PC                         | Positive | PI 184.1 | 100 | 10 | 40 | 8   | 490-590    | 200        |
| PE                              | Positive | NL 141   | 100 | 10 | 30 | 8   | 685-950    | 200        |
| Lyso-PE                         | Positive | NL 141   | 100 | 10 | 30 | 8   | 420-540    | 200        |
| PS                              | Positive | NL 185   | 100 | 10 | 25 | 8   | 730-850    | 200        |
| PIn                             | Negative | PI 241   | 100 | 10 | 30 | 8   | 750-1040   | 200        |
| <i>Fatty acid chain scans</i>   |          |          |     |    |    |     |            |            |
| 14:0                            | Negative | PI 227.2 | 100 | 10 | 55 | 11  | 580-900    | 1000       |
| 16:1                            | Negative | PI 253.2 | 100 | 10 | 55 | 11  | 600-900    | 1000       |
| 16:0                            | Negative | PI 255.2 | 100 | 10 | 55 | 11  | 600-900    | 1000       |
| 17:0                            | Negative | PI 269.3 | 100 | 10 | 55 | 11  | 560-900    | 1000       |
| 18:3                            | Negative | PI 277.2 | 100 | 10 | 40 | 11  | 600-900    | 1000       |
| 18:2                            | Negative | PI 279.2 | 100 | 10 | 40 | 11  | 600-900    | 1000       |
| 18:1                            | Negative | PI 281.3 | 100 | 10 | 55 | 11  | 600-900    | 1000       |
| 18:0                            | Negative | PI 283.3 | 100 | 10 | 55 | 11  | 600-900    | 1000       |
| 19:0                            | Negative | PI 297.3 | 100 | 10 | 55 | 11  | 600-900    | 1000       |
| 20:5                            | Negative | PI 301.2 | 100 | 10 | 40 | 11  | 500-1000   | 1000       |
| 20:4                            | Negative | PI 303.2 | 100 | 10 | 40 | 11  | 600-1000   | 1000       |
| 20:3                            | Negative | PI 305.2 | 100 | 10 | 40 | 11  | 600-1000   | 1000       |
| 20:2                            | Negative | PI 307.2 | 100 | 10 | 40 | 11  | 600-1000   | 1000       |
| 20:1                            | Negative | PI 309.2 | 100 | 10 | 55 | 11  | 600-1000   | 1000       |
| 20:0                            | Negative | PI 311.2 | 100 | 10 | 55 | 11  | 600-1000   | 1000       |
| 22:6                            | Negative | PI 327.2 | 100 | 10 | 40 | 11  | 700-1000   | 1000       |
| 22:5                            | Negative | PI 329.2 | 100 | 10 | 40 | 11  | 700-1000   | 1000       |
| 22:4                            | Negative | PI 331.2 | 100 | 10 | 40 | 11  | 700-1000   | 1000       |
| 22:3                            | Negative | PI 333.3 | 100 | 10 | 40 | 11  | 600-1000   | 1000       |
| 22:2                            | Negative | PI 335.2 | 100 | 10 | 40 | 11  | 700-1000   | 1000       |
| 22:1                            | Negative | PI 337.3 | 100 | 10 | 55 | 11  | 700-1000   | 1000       |
| 22:0                            | Negative | PI 339.3 | 100 | 10 | 55 | 11  | 600-1000   | 1000       |
| 24:1                            | Negative | PI 365.3 | 100 | 10 | 55 | 11  | 700-1000   | 1000       |
| 24:0                            | Negative | PI 367.3 | 100 | 10 | 55 | 11  | 700-1000   | 1000       |

Mass shifting was prevented in negative ion mode by increasing number of summed scans. *PI* precursor ion, *NL* neutral loss, *DP* declustering potential, *EP* entrance potential, *CE* collision energy, *CXP* collision cell exit potential, *PC* phosphatidylcholine; *PE* phosphatidylethanolamine; *PS* phosphatidylserine, *PIn* phosphatidylinositol, *Lyso* Lysophospholipids.

Table S3 – Main molecular phospholipids characterised in phosphatidylcholine (PC) and phosphatidylethanolamine (PE) of bee extract. Phospholipids in this table contain only saturated (SFA) and monounsaturated fatty acid (MUFA).

|              |                | Workers                    | Queens                    | Drones                    |              |                | Workers                     | Queens                      | Drones                      |
|--------------|----------------|----------------------------|---------------------------|---------------------------|--------------|----------------|-----------------------------|-----------------------------|-----------------------------|
| PC 16:0_18:1 | Early larva    | 3.6 ± 0.4                  | 3.9 ± 1.4                 | 3.5 ± 0.2                 | PE 16:0_18:1 | Early larva    | 1.1 ± 0.1***                | 1.0 ± 0.4                   | 0.9 ± 0.03                  |
|              | Late larva     | 3.5 ± 0.1 <sup>a</sup>     | 1.8 ± 0.1 <sup>b</sup>    | 2.8 ± 0.1 <sup>c***</sup> |              | Late larva     | 0.6 ± 0.02*                 | 0.4 ± 0.02***               | 0.6 ± 0.03***               |
|              | Pupa           | 1.8 ± 0.1 <sup>a***</sup>  | 1.5 ± 0.2 <sup>ab</sup>   | 2.3 ± 0.2 <sup>b</sup>    |              | Pupa           | 0.3 ± 0.01                  | 0.3 ± 0.04                  | 0.4 ± 0.04                  |
|              | Emergent adult | 1.5 ± 0.1 <sup>a</sup>     | 1.6 ± 0.6 <sup>ab</sup>   | 2.1 ± 0.1 <sup>b</sup>    |              | Emergent adult | 0.3 ± 0.01                  | 0.3 ± 0.06                  | 0.3 ± 0.01                  |
|              | Young adult    | 0.6 ± 0.02 <sup>a***</sup> | 3.1 ± 0.2 <sup>b</sup>    | 2.1 ± 0.2 <sup>b</sup>    |              | Young adult    | 0.1 ± 0.04 <sup>a</sup>     | 0.8 ± 0.06 <sup>b***</sup>  | 0.4 ± 0.03 <sup>c</sup>     |
|              | Old adult      | 1.5 ± 0.1 <sup>a*</sup>    | 2.3 ± 0.1 <sup>b</sup>    | 1.9 ± 0.1 <sup>b</sup>    |              | Old adult      | 0.30 ± 0.03                 | 0.5 ± 0.04                  | 0.4 ± 0.02                  |
| PC 18:0_18:1 | Early larva    | 0.5 ± 0.05                 | 0.5 ± 0.1                 | 0.5 ± 0.03                | PE 18:0_18:1 | Early larva    | 1.9 ± 0.2                   | 1.5 ± 0.4                   | 1.6 ± 0.1                   |
|              | Late larva     | 0.5 ± 0.02 <sup>a</sup>    | 0.3 ± 0.1 <sup>b</sup>    | 0.7 ± 0.04 <sup>c</sup>   |              | Late larva     | 1.2 ± 0.1***                | 0.8 ± 0.1                   | 1.4 ± 0.1                   |
|              | Pupa           | 0.4 ± 0.02                 | 0.3 ± 0.04                | 0.5 ± 0.07                |              | Pupa           | 1.0 ± 0.04                  | 0.8 ± 0.1                   | 1.1 ± 0.1                   |
|              | Emergent adult | 0.5 ± 0.01 <sup>a</sup>    | 0.4 ± 0.05 <sup>ab</sup>  | 0.6 ± 0.02 <sup>b</sup>   |              | Emergent adult | 1.3 ± 0.01                  | 1.0 ± 0.2                   | 1.1 ± 0.05                  |
|              | Young adult    | 0.4 ± 0.02 <sup>a***</sup> | 0.9 ± 0.1 <sup>b*</sup>   | 0.6 ± 0.03 <sup>c</sup>   |              | Young adult    | 0.8 ± 0.03 <sup>a*</sup>    | 1.9 ± 0.1 <sup>b***</sup>   | 1.6 ± 0.05 <sup>b</sup>     |
|              | Old adult      | 1.0 ± 0.1 <sup>a***</sup>  | 0.8 ± 0.05 <sup>ab</sup>  | 0.6 ± 0.02 <sup>b</sup>   |              | Old adult      | 1.5 ± 0.1***                | 1.7 ± 0.1                   | 1.6 ± 0.07                  |
| PC 16:1_18:1 | Early larva    | 1.1 ± 0.1 <sup>a</sup>     | 0.7 ± 0.2 <sup>b</sup>    | 0.5 ± 0.01 <sup>a</sup>   | PE 16:1_18:1 | Early larva    | 0.28 ± 0.04 <sup>a</sup>    | 0.17 ± 0.05 <sup>ab</sup>   | 0.12 ± 0.003 <sup>b</sup>   |
|              | Late larva     | 0.1 ± 0.01 <sup>**</sup>   | 0.2 ± 0.02 <sup>***</sup> | 0.3 ± 0.02                |              | Late larva     | 0.02 ± 0.002 <sup>***</sup> | 0.02 ± 0.002                | 0.05 ± 0.004                |
|              | Pupa           | 0.2 ± 0.03                 | 0.1 ± 0.02                | 0.2 ± 0.01                |              | Pupa           | 0.01 ± 0.001                | 0.04 ± 0.003                | 0.03 ± 0.003                |
|              | Emergent adult | 0.3 ± 0.01                 | 0.3 ± 0.05                | 0.4 ± 0.01                |              | Emergent adult | 0.05 ± 0.001                | 0.04 ± 0.01                 | 0.05 ± 0.002                |
|              | Young adult    | 0.1 ± 0.01 <sup>a</sup>    | 1.6 ± 0.2 <sup>b***</sup> | 1.5 ± 0.1 <sup>b***</sup> |              | Young adult    | 0.03 ± 0.002 <sup>a</sup>   | 0.34 ± 0.05 <sup>b***</sup> | 0.27 ± 0.01 <sup>b***</sup> |
|              | Old adult      | 0.3 ± 0.02 <sup>a</sup>    | 1.0 ± 0.1 <sup>b</sup>    | 1.5 ± 0.1 <sup>c</sup>    |              | Old adult      | 0.07 ± 0.001 <sup>a</sup>   | 0.16 ± 0.01 <sup>a***</sup> | 0.28 ± 0.03 <sup>b</sup>    |
| PC 18:1_18:1 | Early larva    | 6.6 ± 0.7                  | 6.0 ± 2.0                 | 5.6 ± 0.2                 | PE 18:1_18:1 | Early larva    | 3.1 ± 0.3                   | 2.7 ± 0.8                   | 2.7 ± 0.1                   |
|              | Late larva     | 4.4 ± 0.2 <sup>***</sup>   | 3.2 ± 0.2 <sup>*</sup>    | 4.6 ± 0.2                 |              | Late larva     | 1.7 ± 0.1 <sup>a***</sup>   | 0.8 ± 0.1 <sup>b***</sup>   | 2.0 ± 0.1 <sup>a</sup>      |
|              | Pupa           | 3.1 ± 0.2                  | 3.0 ± 0.4                 | 4.2 ± 0.3                 |              | Pupa           | 1.0 ± 0.1                   | 0.9 ± 0.1                   | 1.2 ± 0.1                   |
|              | Emergent adult | 3.6 ± 0.1 <sup>a</sup>     | 5.2 ± 0.5 <sup>b*</sup>   | 4.4 ± 0.1 <sup>b</sup>    |              | Emergent adult | 2.0 ± 0.03 <sup>**</sup>    | 1.7 ± 0.4                   | 1.7 ± 0.1                   |
|              | Young adult    | 2.3 ± 0.1 <sup>a</sup>     | 6.8 ± 0.7 <sup>b</sup>    | 6.3 ± 0.2 <sup>b</sup>    |              | Young adult    | 2.0 ± 0.1 <sup>a</sup>      | 3.9 ± 0.3 <sup>b***</sup>   | 4.4 ± 0.3 <sup>b</sup>      |
|              | Old adult      | 5.2 ± 0.3 <sup>***</sup>   | 7.1 ± 0.3                 | 6.8 ± 0.2                 |              | Old adult      | 3.4 ± 0.1 <sup>a***</sup>   | 3.2 ± 0.2 <sup>a</sup>      | 4.6 ± 0.2 <sup>b</sup>      |

Data are expressed in nmol mg and as mean ± s.e.m. Letter indicates significant difference among the castes for the a given life-history stage with  $p < 0.05$  (e.g. levels of PC 16:0\_18:1 differ significantly among all caste at Late larva stage. Asterisk indicates significant change from previous life-history stages within the same caste (i.e. level of PC 16:0\_18:1 increases from Late larva to Pupa stage, in workers) with \*  $p < 0.05$ , \*\*  $p < 0.01$ , \*\*\*  $p < 0.001$ . Numbers of replicates per group are provided in Table 3.

Table S4 – Main molecular phospholipids characterised in phosphatidylinositol (PI<sub>n</sub>) and phosphatidylserine (PS) of bee extract. Phospholipids in this table contain only saturated (SFA) and monounsaturated fatty acid (MUFA).

|                           |                | Workers                        | Queens                       | Drones                       |              |                | Workers                     | Queens                      | Drones                      |
|---------------------------|----------------|--------------------------------|------------------------------|------------------------------|--------------|----------------|-----------------------------|-----------------------------|-----------------------------|
| PI <sub>n</sub> 16:0_18:1 | Early larva    | 0.14 ± 0.03 <sup>a</sup>       | 0.14 ± 0.05 <sup>a</sup>     | ND                           | PS 16:0_18:1 | Early larva    | 0.12 ± 0.01 <sup>a</sup>    | 0.09 ± 0.03 <sup>ab</sup>   | 0.07 ± 0.01 <sup>b</sup>    |
|                           | Late larva     | 0.001 ± 0.0001 <sup>***</sup>  | ND                           | ND                           |              | Late larva     | 0.05 ± 0.002 <sup>***</sup> | ND                          | 0.07 ± 0.01                 |
|                           | Pupa           | 0.0004 ± 0.0001                | ND                           | ND                           |              | Pupa           | 0.04 ± 0.002                | ND                          | 0.06 ± 0.01                 |
|                           | Emergent adult | 0.02 ± 0.002                   | ND                           | ND                           |              | Emergent adult | 0.03 ± 0.001 <sup>a</sup>   | ND                          | 0.06 ± 0.001 <sup>b</sup>   |
|                           | Young adult    | 0.005 ± 0.0004                 | ND                           | ND                           |              | Young adult    | 0.01 ± 0.002 <sup>a</sup>   | ND                          | 0.05 ± 0.003 <sup>b</sup>   |
|                           | Old adult      | 0.03 ± 0.01                    | ND                           | ND                           |              | Old adult      | 0.03 ± 0.003                | ND                          | 0.04 ± 0.002                |
| PI <sub>n</sub> 18:0_18:1 | Early larva    | 0.15 ± 0.03                    | 0.13 ± 0.03                  | 0.20 ± 0.02                  | PS 18:0_18:1 | Early larva    | ND                          | 0.010 ± 0.003               | ND                          |
|                           | Late larva     | 0.002 ± 0.0003 <sup>***</sup>  | 0.20 ± 0.03                  | 0.14 ± 0.03                  |              | Late larva     | ND                          | 0.003 ± 0.0002              | ND                          |
|                           | Pupa           | 0.0003 ± 0.0001 <sup>a</sup>   | 0.32 ± 0.03 <sup>b</sup>     | 0.25 ± 0.09 <sup>b</sup>     |              | Pupa           | ND                          | 0.002 ± 0.0005 <sup>a</sup> | 0.03 ± 0.01 <sup>b***</sup> |
|                           | Emergent adult | 0.05 ± 0.006 <sup>a</sup>      | 0.48 ± 0.1 <sup>b</sup>      | 0.25 ± 0.02 <sup>c</sup>     |              | Emergent adult | 0.004 ± 0.0003 <sup>a</sup> | 0.004 ± 0.001 <sup>a</sup>  | 0.04 ± 0.001 <sup>b</sup>   |
|                           | Young adult    | 0.02 ± 0.0005 <sup>a</sup>     | 0.60 ± 0.1 <sup>b</sup>      | 0.04 ± 0.004 <sup>a***</sup> |              | Young adult    | 0.002 ± 0.0003 <sup>a</sup> | 0.02 ± 0.003 <sup>b</sup>   | 0.01 ± 0.002 <sup>ab</sup>  |
|                           | Old adult      | 0.04 ± 0.005 <sup>a</sup>      | 0.35 ± 0.04 <sup>b***</sup>  | 0.05 ± 0.008 <sup>a</sup>    |              | Old adult      | 0.003 ± 0.0005              | 0.01 ± 0.001                | 0.01 ± 0.001                |
| PI <sub>n</sub> 16:1_18:1 | Early larva    | ND                             | ND                           | ND                           | PS 16:1_18:1 | Early larva    | 0.4 ± 0.04                  | 0.3 ± 0.08                  | 0.3 ± 0.1                   |
|                           | Late larva     | ND                             | ND                           | ND                           |              | Late larva     | 0.3 ± 0.02                  | 0.3 ± 0.02                  | 0.3 ± 0.04                  |
|                           | Pupa           | ND                             | ND                           | ND                           |              | Pupa           | 0.2 ± 0.01                  | 0.2 ± 0.03                  | 0.1 ± 0.1                   |
|                           | Emergent adult | ND                             | ND                           | ND                           |              | Emergent adult | 0.3 ± 0.01                  | 0.4 ± 0.18                  | 0.02 ± 0.001                |
|                           | Young adult    | ND                             | ND                           | ND                           |              | Young adult    | 0.2 ± 0.01 <sup>a</sup>     | 0.5 ± 0.04 <sup>b</sup>     | 0.4 ± 0.01 <sup>ab</sup>    |
|                           | Old adult      | ND                             | ND                           | ND                           |              | Old adult      | 0.3 ± 0.02                  | 0.4 ± 0.03                  | 0.3 ± 0.01                  |
| PI <sub>n</sub> 18:1_18:1 | Early larva    | 0.16 ± 0.02                    | 0.1 ± 0.03                   | 0.16 ± 0.01                  | PS 18:1_18:1 | Early larva    | 0.3 ± 0.03                  | 0.3 ± 0.1                   | 0.2 ± 0.04                  |
|                           | Late larva     | 0.001 ± 0.0002 <sup>a***</sup> | 0.2 ± 0.02 <sup>b</sup>      | 0.07 ± 0.02 <sup>c***</sup>  |              | Late larva     | 0.2 ± 0.01 <sup>a***</sup>  | 0.1 ± 0.01 <sup>a***</sup>  | 0.2 ± 0.03 <sup>b</sup>     |
|                           | Pupa           | 0.0003 ± 0.0001 <sup>a</sup>   | 0.3 ± 0.01 <sup>b***</sup>   | 0.05 ± 0.01 <sup>a</sup>     |              | Pupa           | 0.2 ± 0.01                  | 0.1 ± 0.02                  | 0.1 ± 0.06                  |
|                           | Emergent adult | 0.04 ± 0.004 <sup>a***</sup>   | 0.4 ± 0.04 <sup>b</sup>      | 0.4 ± 0.01 <sup>b***</sup>   |              | Emergent adult | 0.2 ± 0.004 <sup>*</sup>    | 0.3 ± 0.15                  | 0.02 ± 0.001                |
|                           | Young adult    | 0.02 ± 0.001                   | 0.006 ± 0.001 <sup>***</sup> | 0.04 ± 0.003 <sup>***</sup>  |              | Young adult    | 0.1 ± 0.002 <sup>a</sup>    | 0.3 ± 0.03 <sup>b</sup>     | 0.3 ± 0.01 <sup>b***</sup>  |
|                           | Old adult      | 0.03 ± 0.003                   | 0.004 ± 0.001                | 0.06 ± 0.01                  |              | Old adult      | 0.2 ± 0.01 <sup>a***</sup>  | 0.2 ± 0.02 <sup>a***</sup>  | 0.2 ± 0.01 <sup>b</sup>     |

Data are expressed in nmol mg and as mean ± s.e.m. Letter indicates significant difference among the castes for the a given life-history stage with  $p < 0.05$  (e.g. levels of PI<sub>n</sub>16:0\_18:1 are similar between workers and queens at Early larva stage). Asterisk indicates significant change from previous life-history stages within the same caste (i.e. level of PI<sub>n</sub> 16:0\_18:1 increases from Early larva to Late larva stage, in workers) with \*  $p < 0.05$ , \*\*  $p < 0.01$ , \*\*\* $p < 0.001$ . Numbers of replicates per group are provided in Table 3.

Table S5 – Main molecular phospholipids characterised in phosphatidylcholine (PC) and phosphatidylethanolamine (PE) of bee extract. Phospholipids in this table contain at least one polyunsaturated fatty acid (PUFA).

|              |                | Workers                     | Queens                      | Drones                       |              |                | Workers                     | Queens                       | Drones                          |
|--------------|----------------|-----------------------------|-----------------------------|------------------------------|--------------|----------------|-----------------------------|------------------------------|---------------------------------|
| PC 16:0_18:3 | Early larva    | 0.04 ± 0.005                | ND                          | 0.03 ± 0.01                  | PE 16:0_18:3 | Early larva    | ND                          | ND                           | ND                              |
|              | Late larva     | 0.06 ± 0.005                | 0.02 ± 0.002                | 0.03 ± 0.01                  |              | Late larva     | ND                          | ND                           | ND                              |
|              | Pupa           | 0.05 ± 0.004                | 0.01 ± 0.001                | 0.06 ± 0.01                  |              | Pupa           | ND                          | ND                           | 0.01 ± 0.001 <sup>b</sup>       |
|              | Emergent adult | 0.06 ± 0.003                | 0.02 ± 0.004                | 0.04 ± 0.004                 |              | Emergent adult | ND                          | 0.002 ± 0.001 <sup>a</sup>   | 0.004 ± 0.0004 <sup>ab***</sup> |
|              | Young adult    | 0.2 ± 0.02 <sup>***</sup>   | 0.1 ± 0.01 <sup>*</sup>     | 0.09 ± 0.02                  |              | Young adult    | ND                          | 0.01 ± 0.001 <sup>a***</sup> | 0.01 ± 0.001 <sup>b</sup>       |
|              | Old adult      | 0.4 ± 0.033 <sup>a***</sup> | 0.1 ± 0.004 <sup>b</sup>    | ND                           |              | Old adult      | ND                          | 0.02 ± 0.002 <sup>a***</sup> | 0.01 ± 0.001 <sup>b</sup>       |
| PC 18:0_18:3 | Early larva    | ND                          | ND                          | ND                           | PE 18:0_18:3 | Early larva    | ND                          | 0.02 ± 0.001                 | 0.03 ± 0.002                    |
|              | Late larva     | ND                          | 0.01 ± 0.001                | ND                           |              | Late larva     | ND                          | 0.02 ± 0.002                 | 0.02 ± 0.002                    |
|              | Pupa           | 0.02 ± 0.001                | 0.01 ± 0.001                | 0.02 ± 0.004                 |              | Pupa           | ND                          | 0.02 ± 0.002                 | 0.03 ± 0.005                    |
|              | Emergent adult | 0.04 ± 0.001                | 0.01 ± 0.003                | 0.02 ± 0.003                 |              | Emergent adult | 0.1 ± 0.003                 | 0.02 ± 0.005                 | 0.05 ± 0.005                    |
|              | Young adult    | 0.08 ± 0.005 <sup>a</sup>   | 0.05 ± 0.004 <sup>a</sup>   | 0.4 ± 0.04 <sup>a***</sup>   |              | Young adult    | 0.2 ± 0.01 <sup>*</sup>     | 0.10 ± 0.01 <sup>***</sup>   | 0.09 ± 0.01                     |
|              | Old adult      | 0.35 ± 0.04 <sup>a***</sup> | 0.06 ± 0.005 <sup>b</sup>   | 0.3 ± 0.02 <sup>a</sup>      |              | Old adult      | 0.5 ± 0.04 <sup>a***</sup>  | 0.12 ± 0.01 <sup>b</sup>     | 0.08 ± 0.005 <sup>b</sup>       |
| PC 18:1_18:2 | Early larva    | 0.05 ± 0.01                 | 0.06 ± 0.02                 | 0.05 ± 0.002                 | PE 18:1_18:2 | Early larva    | 0.20 ± 0.02 <sup>a</sup>    | 0.03 ± 0.001 <sup>b</sup>    | 0.02 ± 0.001 <sup>b</sup>       |
|              | Late larva     | 0.14 ± 0.01                 | 0.02 ± 0.003                | 0.05 ± 0.01                  |              | Late larva     | 0.07 ± 0.01 <sup>a</sup>    | 0.003 ± 0.001 <sup>b</sup>   | 0.02 ± 0.001 <sup>b</sup>       |
|              | Pupa           | 0.10 ± 0.004                | 0.03 ± 0.004                | 0.16 ± 0.03                  |              | Pupa           | 0.07 ± 0.003 <sup>a</sup>   | 0.01 ± 0.001 <sup>b</sup>    | 0.03 ± 0.004 <sup>b</sup>       |
|              | Emergent adult | 0.12 ± 0.01 <sup>a</sup>    | 0.05 ± 0.01 <sup>a</sup>    | 0.40 ± 0.05 <sup>b***</sup>  |              | Emergent adult | 0.04 ± 0.004 <sup>a</sup>   | 0.01 ± 0.003 <sup>a</sup>    | 0.07 ± 0.01 <sup>b</sup>        |
|              | Young adult    | 0.41 ± 0.02 <sup>a***</sup> | 0.20 ± 0.01 <sup>b*</sup>   | 0.03 ± 0.003 <sup>c***</sup> |              | Young adult    | 0.16 ± 0.01 <sup>a***</sup> | 0.07 ± 0.01 <sup>b***</sup>  | 0.10 ± 0.01 <sup>b</sup>        |
|              | Old adult      | 0.94 ± 0.06 <sup>a***</sup> | 0.22 ± 0.02 <sup>b</sup>    | 0.04 ± 0.003 <sup>c</sup>    |              | Old adult      | 0.25 ± 0.01 <sup>a***</sup> | 0.08 ± 0.01 <sup>b</sup>     | 0.10 ± 0.01 <sup>b</sup>        |
| PC 18:1_18:3 | Early larva    | 0.11 ± 0.01                 | 0.07 ± 0.002                | 0.16 ± 0.01                  | PC 18:1_18:3 | Early larva    | ND                          | 0.04 ± 0.004                 | 0.06 ± 0.002                    |
|              | Late larva     | 0.21 ± 0.02                 | 0.07 ± 0.01                 | 0.13 ± 0.01                  |              | Late larva     | ND                          | 0.02 ± 0.002 <sup>a</sup>    | 0.05 ± 0.002 <sup>b</sup>       |
|              | Pupa           | 0.14 ± 0.01                 | 0.04 ± 0.01                 | 0.23 ± 0.1                   |              | Pupa           | ND                          | 0.01 ± 0.002                 | 0.04 ± 0.01                     |
|              | Emergent adult | 0.19 ± 0.01                 | 0.07 ± 0.01                 | 0.14 ± 0.01                  |              | Emergent adult | 0.07 ± 0.003 <sup>a</sup>   | 0.01 ± 0.004 <sup>b</sup>    | 0.04 ± 0.003 <sup>b</sup>       |
|              | Young adult    | 0.74 ± 0.04 <sup>a***</sup> | 0.42 ± 0.04 <sup>b***</sup> | 0.33 ± 0.04 <sup>b</sup>     |              | Young adult    | 0.26 ± 0.01 <sup>a***</sup> | 0.14 ± 0.02 <sup>b***</sup>  | 0.12 ± 0.01 <sup>b</sup>        |
|              | Old adult      | 1.58 ± 0.12 <sup>a***</sup> | 0.55 ± 0.06 <sup>b</sup>    | 0.25 ± 0.02 <sup>c</sup>     |              | Old adult      | 0.45 ± 0.03 <sup>a***</sup> | 0.19 ± 0.03 <sup>b</sup>     | 0.11 ± 0.01 <sup>c</sup>        |

Data are expressed in nmol·mg and as mean ± s.e.m.. Letter indicates significant difference among the castes for the a given life-history stage with  $p < 0.05$  (e.g. levels of PC 16:0\_18:3 differ between workers and queens at Old adult stage). Asterisk indicates significant change from previous life-history stages within the same caste (i.e. level of PC 16:0\_18:3 increases from Emergent adult to Young adult stage, in workers) with \*  $p < 0.05$ , \*\*  $p < 0.01$ , \*\*\*  $p < 0.001$ . Numbers of replicates per group are provided in Table 3.

Table S6 – Main molecular phospholipids characterised in phosphatidylinositol (PI<sub>n</sub>) and phosphatidylserine (PS) of bee extract. Phospholipids in this table contain at least one polyunsaturated fatty acid (PUFA).

|                           |                | Workers                      | Queens                      | Drones                       |              |                | Workers                      | Queens                     | Drones                      |
|---------------------------|----------------|------------------------------|-----------------------------|------------------------------|--------------|----------------|------------------------------|----------------------------|-----------------------------|
| PI <sub>n</sub> 16:0_18:3 | Early larva    | 0.04 ± 0.1                   | ND                          | 0.03 ± 0.002                 | PS 16:0_18:3 | Early larva    | ND                           | ND                         | ND                          |
|                           | Late larva     | 0.0005 ± 0.0001              | 0.06 ± 0.01                 | 0.02 ± 0.004                 |              | Late larva     | ND                           | ND                         | ND                          |
|                           | Pupa           | 0.0003 ± 0.0001 <sup>a</sup> | 0.05 ± 0.004 <sup>a</sup>   | 0.12 ± 0.03 <sup>b***</sup>  |              | Pupa           | ND                           | ND                         | ND                          |
|                           | Emergent adult | 0.02 ± 0.002 <sup>a</sup>    | 0.02 ± 0.003 <sup>b</sup>   | 0.10 ± 0.01 <sup>b</sup>     |              | Emergent adult | ND                           | ND                         | ND                          |
|                           | Young adult    | 0.02 ± 0.002 <sup>a</sup>    | 0.2 ± 0.03 <sup>b***</sup>  | 0.02 ± 0.003 <sup>a***</sup> |              | Young adult    | ND                           | ND                         | ND                          |
|                           | Old adult      | 0.03 ± 0.005 <sup>a</sup>    | 0.11 ± 0.02 <sup>b*</sup>   | 0.02 ± 0.002 <sup>a</sup>    |              | Old adult      | ND                           | ND                         | ND                          |
| PI <sub>n</sub> 18:0_18:3 | Early larva    | 0.06 ± 0.01                  | ND                          | 0.1 ± 0.01                   | PS 18:0_18:3 | Early larva    | ND                           | ND                         | ND                          |
|                           | Late larva     | 0.001 ± 0.0002               | 0.15 ± 0.02                 | 0.06 ± 0.01                  |              | Late larva     | 0.01 ± 0.002                 | 0.004 ± 0.000              | ND                          |
|                           | Pupa           | 0.001 ± 0.0002               | 0.11 ± 0.01                 | 0.40 ± 0.1 <sup>***</sup>    |              | Pupa           | 0.02 ± 0.002                 | 0.007 ± 0.001              | 0.01 ± 0.004                |
|                           | Emergent adult | 0.20 ± 0.02 <sup>a***</sup>  | 0.10 ± 0.01 <sup>a</sup>    | 0.60 ± 0.04 <sup>b</sup>     |              | Emergent adult | 0.03 ± 0.001                 | 0.005 ± 0.002              | 0.01 ± 0.000                |
|                           | Young adult    | 0.09 ± 0.01 <sup>a</sup>     | 0.96 ± 0.2 <sup>b***</sup>  | 0.11 ± 0.01 <sup>a***</sup>  |              | Young adult    | 0.04 ± 0.003                 | 0.03 ± 0.003               | 0.04 ± 0.003                |
|                           | Old adult      | 0.30 ± 0.04 <sup>a***</sup>  | 0.65 ± 0.1 <sup>b***</sup>  | 0.10 ± 0.01 <sup>c</sup>     |              | Old adult      | 0.11 ± 0.01 <sup>a***</sup>  | 0.04 ± 0.003 <sup>b</sup>  | 0.04 ± 0.002 <sup>b</sup>   |
| PI <sub>n</sub> 18:1_18:2 | Early larva    | ND                           | ND                          | ND                           | PS 18:1_18:2 | Early larva    | ND                           | ND                         | ND                          |
|                           | Late larva     | ND                           | 0.01 ± 0.001                | ND                           |              | Late larva     | ND                           | ND                         | ND                          |
|                           | Pupa           | ND                           | 0.03 ± 0.003                | 0.05 ± 0.02                  |              | Pupa           | ND                           | 0.001 ± 0.000              | 0.15 ± 0.04 <sup>***</sup>  |
|                           | Emergent adult | ND                           | 0.003 ± 0.003               | 0.09 ± 0.01                  |              | Emergent adult | 0.01 ± 0.001 <sup>a</sup>    | 0.004 ± 0.001 <sup>a</sup> | 0.17 ± 0.005 <sup>b</sup>   |
|                           | Young adult    | ND                           | 0.05 ± 0.01                 | 0.03 ± 0.003                 |              | Young adult    | 0.01 ± 0.002                 | 0.01 ± 0.001               | 0.01 ± 0.001 <sup>***</sup> |
|                           | Old adult      | ND                           | 0.04 ± 0.01                 | 0.03 ± 0.003                 |              | Old adult      | 0.02 ± 0.001                 | 0.01 ± 0.000               | 0.01 ± 0.001                |
| PI <sub>n</sub> 18:1_18:3 | Early larva    | ND                           | ND                          | 0.03 ± 0.003                 | PS 18:1_18:3 | Early larva    | ND                           | ND                         | ND                          |
|                           | Late larva     | 0.004 ± 0.001                | 0.05 ± 0.01                 | 0.02 ± 0.003                 |              | Late larva     | 0.004 ± 0.001                | 0.003 ± 0.001              | ND                          |
|                           | Pupa           | 0.01 ± 0.001 <sup>a</sup>    | 0.05 ± 0.005 <sup>a</sup>   | 0.13 ± 0.03 <sup>b***</sup>  |              | Pupa           | 0.01 ± 0.001                 | 0.004 ± 0.001              | 0.01 ± 0.003                |
|                           | Emergent adult | 0.02 ± 0.0004 <sup>a</sup>   | 0.04 ± 0.003 <sup>a</sup>   | 0.16 ± 0.01 <sup>b</sup>     |              | Emergent adult | 0.02 ± 0.001                 | 0.01 ± 0.001               | 0.01 ± 0.000                |
|                           | Young adult    | 0.02 ± 0.001 <sup>a</sup>    | 0.20 ± 0.03 <sup>b***</sup> | 0.03 ± 0.003 <sup>a***</sup> |              | Young adult    | 0.02 ± 0.001                 | 0.01 ± 0.001               | 0.02 ± 0.001                |
|                           | Old adult      | 0.04 ± 0.002 <sup>a</sup>    | 0.16 ± 0.03 <sup>b</sup>    | 0.04 ± 0.005 <sup>a</sup>    |              | Old adult      | 0.04 ± 0.002 <sup>a***</sup> | 0.02 ± 0.003 <sup>b</sup>  | 0.02 ± 0.001 <sup>b</sup>   |

Data are expressed in nmol mg and as mean ± s.e.m. Letter indicates significant difference among the castes for the a given life-history stage with  $p < 0.05$  (e.g. levels of PI<sub>n</sub> 16:0\_18:3 in workers and queens are different to drones at Pupa stage). Asterisk indicates significant change from previous life-history stages within the same caste (i.e. level of PI<sub>n</sub> 16:0\_18:3 increases from Emergent adult to Young adult stage, in queens) with \*  $p < 0.05$ , \*\*  $p < 0.01$ , \*\*\*  $p < 0.001$ . Numbers of replicates per group are provided in Table 3.
